# Supplementary material
Source: PubMed Central journal article supplement (PMC3612645)
Supplement: 1210835110_pnas.201210835SI.pdf [file 1210835110_pnas.201210835SI.pdf]

# Supporting Information

Kumpf et al. 10.1073/pnas.1210835110

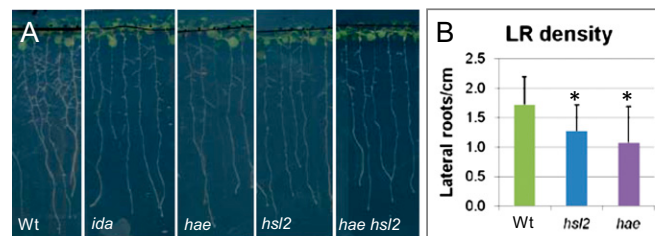

**Fig. S1.** Inflorescences deficient in abscission (*ida*), *haesa* (*hae*), *haesa-like2* (*hsl2*), and *hae hsl2* mutants show reduced lateral root density. (A) Wild type (WT) and mutant seedlings as indicated 9 d after stratification. (B) Lateral root (LR) density (number of LRs per cm root) for *hsl2* ( $n = 50$ ), *hae* ( $n = 48$ ), and WT plants ( $n = 50$ ) 9 d after stratification. \*Significant deviation from WT, Student  $t$  test.

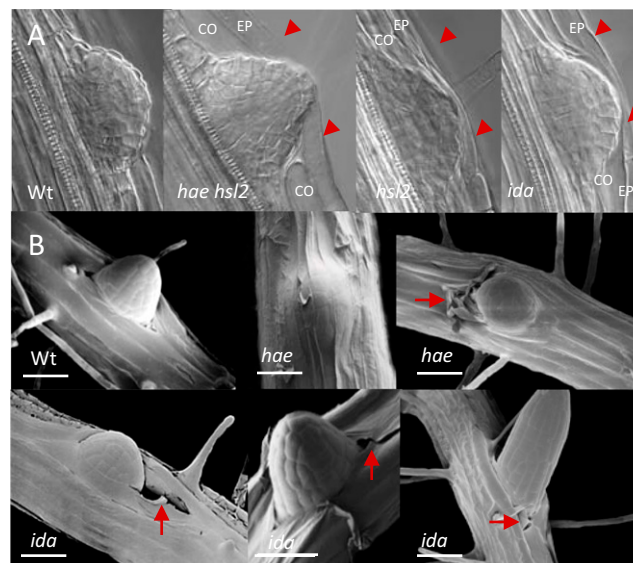

**Fig. S2.** Mutation in *HAE* and *IDA* results in delayed emergence and ruptured epidermal cells. (A) Representative WT lateral root primordia (LRP) at emergence (stage VIII) and *hae hsl2*, *hsl2*, and *ida* LRP at a similar developmental stage still covered with an epidermal (EP) cell. Arrowheads, EP cell walls. (B) Representative cryo scanning electron microscopy (SEM) images of WT, *hae*, and *ida* LRs at emergence. Note *hae* LR still covered with overlaying tissue. Arrows, rifts in flattened and ruptured EP cells, not seen for WT roots (7–10 roots inspected per genotype). (Scale bars: 30  $\mu$ M.)

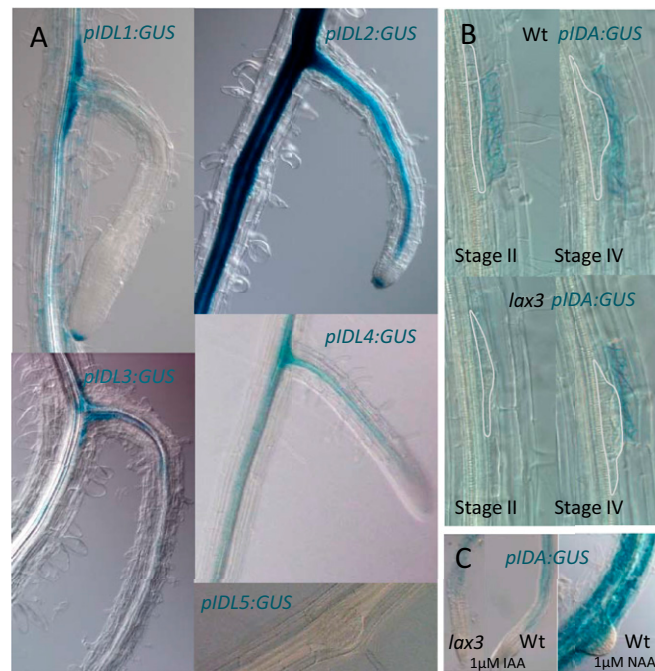

**Fig. S3.** *IDA* has a unique expression pattern at the LR compared with the closely related *IDA-LIKE* (*IDL*) genes. (A) Lateral root expression pattern of the promoter: $\beta$ -glucuronidase (*GUS*) transcriptional fusion constructs for *IDL1-IDL5*. Note that *pIDL5:GUS* is not expressed. (B) *pIDA:GUS* expression in cells overlaying LR in WT and *like aux1-3* (*lax3*) background at stages II and IV, as indicated. The outlines of LRP are shown in gray. (C) *pIDA:GUS* expression in WT and *lax3* mutant background at LR with 1  $\mu$ M indole-3-acetic acid (IAA) and in WT with 1  $\mu$ M naphthaleneacetic acid (NAA).

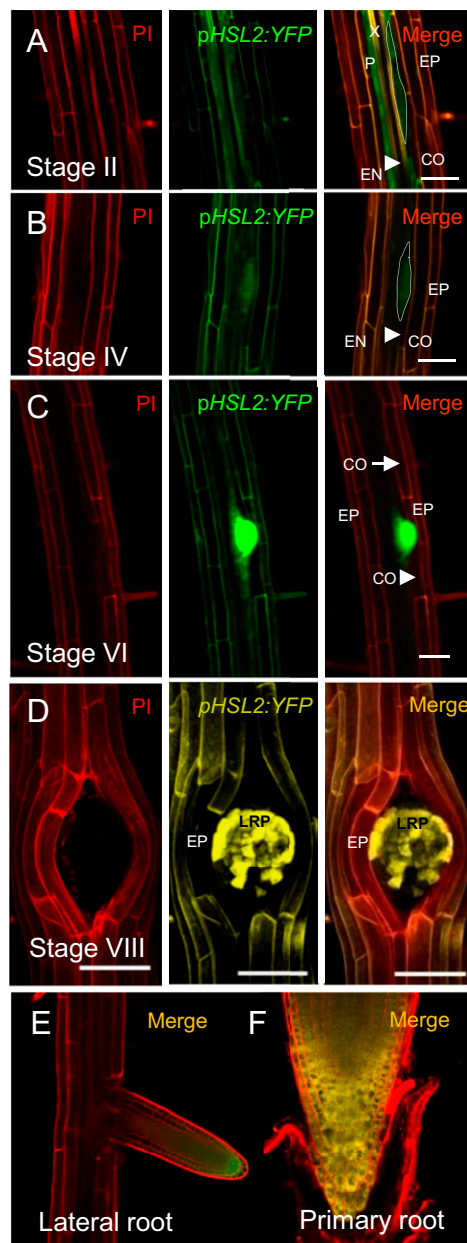

**Fig. S4.** *HSL2* is expressed in the LRP. (A–C) Confocal images of *pHSL2:YFP* expression at stages II, IV, and VI, as indicated. Note in (C) lower YFP intensity in the cortex (CO) cell the LRP is passing (arrowhead) than in neighboring CO cell (arrow). (D) Confocal images of *HSL2:YFP* expression after emergence (stage VIII). Note low expression in the EP cell closest to the LRP. Note that propidium iodide (PI) does not penetrate the EN or the LRP and therefore does not stain the inner endodermal (EN) wall and LR cell walls. (Left) PI-stained root; (Center) YFP signal; (Right) merge. (Scale bars: 50  $\mu$ M.) (E and F) Confocal images of *pHSL2:YFP* expression in the tip of lateral and primary roots stained with PI.

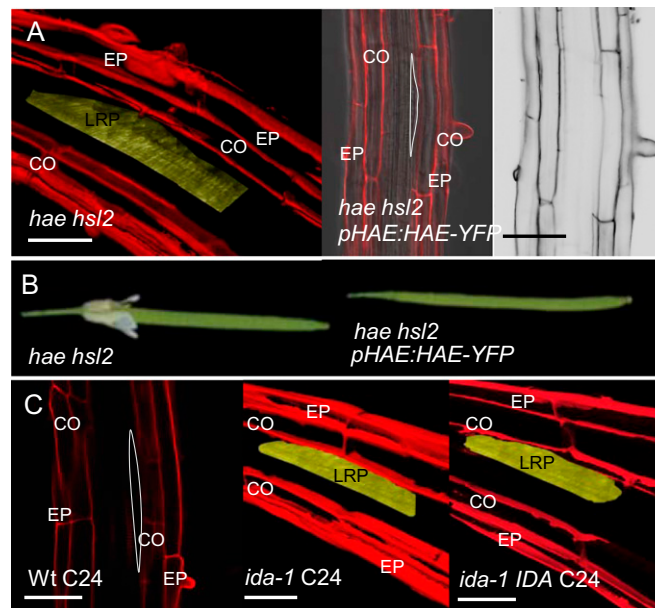

**Fig. S5.** Complementation of mutant phenotypes demonstrates *IDA* and *HAE* involvement in cell wall degradation. (A) PI-stained roots of *hae hsl2* (3D, LRP colored yellow), and *hae hsl2* transformed with *pHAE:HAE-YFP* showing rescue of the *hae hsl2* pectin breakdown deficiency in LRP overlaying cells. (Left) 2D confocal image of PI stain merged with image of root; (Right) inverted PI stain. (B) Rescue of the *hae hsl2* abscission deficiency by the translational fusion construct *pHAE:HAE-YFP*. (C) PI-stained roots at the site of stage I LRP (C24 ecotype). (Left) 2D confocal image of WT; (Center) 3D confocal image of PI stained *ida-1* mutant merged with image of root (LRP colored yellow); (Right) 3D confocal image of PI stained *ida-1* mutant complemented with the WT *IDA* gene (C24) merged with image of root (LRP colored yellow). Note that PI does not penetrate the EN or the LRP and therefore does not stain the inner EN wall and LRP cells walls. (Scale bars: 30  $\mu$ M in 3D images, 20  $\mu$ M in 2D images.)



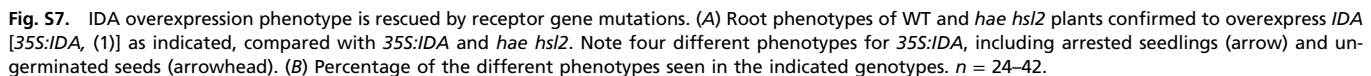Kumpf et al. [www.pnas.org/cgi/content/short/1210835110](http://www.pnas.org/cgi/content/short/1210835110) 6 of 6

\*Primers used for Gateway cloning have additionally the given attB1 or attB2 sequences in the 5' end.
